# Supplementary material
Source: PubMed Central journal article supplement (PMC3178405)

**Supplementary File S3** Conserved DNA motifs found within the upstream regions. Positions relative to the transcription start sites are specified. (a) Motif upstream the 5S ribosomal DNA transcription start site. We included sequences from all the razor shell species studied in this survey (see main text). (b) Motif upstream the U1 small nuclear DNA transcription start site. We included sequences from all the razor shell species studied in this survey (see main text), and from the gastropods *Aplysia californica* and *Lottia gigantea*. Logos constructed using WebLogo 2.8.2 available at <http://weblogo.berkeley.edu/>.

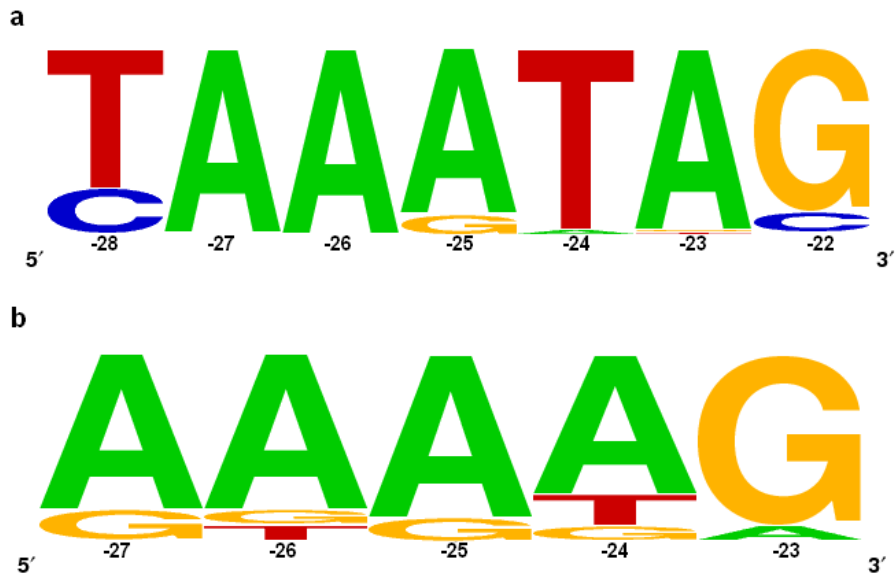

Supplement: hdy2010174x3.pdf [file hdy2010174x3.pdf]
