# Supplementary material
Source: PubMed Central journal article supplement (PMC3178405)
Supplement: hdy2010174x4.pdf [file hdy2010174x4.pdf]

**Supplementary File S4** DNA sequence of an *Ensis macha* 5S-U1 clone. The pink region corresponds to the RNA coding region of 5S ribosomal DNA (5S). Region shaded in green is a partial RNA coding region of U1 small nuclear DNA (type A, see main text). The nontranscribed spacer (NTS) located between both RNA coding regions is referred to as iota NTS in the main text. Light blue shaded region is similar to epsilon 2 NTS from the species *E. macha* (see main text). Yellow region is a truncated pseudogenised 5S rDNA copy, as it is similar to the 5S and NTS flanked by the arrows. The grey region is similar to a DNA fragment associated to the *Taenia solium* spliced leader sequence and spliced leader mini-exon (accession number AJ428456; identities=72%, gaps=11%, E value=4·10<sup>-6</sup>).

```

      *      20      *      40      *      60      *      80      *      100
GAAAAACACCGGTTCTCGCCCGATCACCGAAGTTAAGCAACGTCGAGCCCGGTTAGTACTTGGATGGGTGACCGCCTGGGAATACCGGTTGCTGTAGACTT
      *      120     *      140     *      160     *      180     *      200
TTTTTCTCTCTCCCTGTCTCATGTATTTACTTTTTACGCTCTGTTATCTATTTCATGTGCTTTAGGTCTCACATCTATGCCACTTCGATTGATTTATTG
      *      220     *      240     *      260     *      280     *      300
ATTGTTTGATTGATATTGATTTTCTATTTTGATAGACATCTTTTACCGATTGATTACAGATAGATCGAGTACATGCACCTTGGTTAGTACCTGGATGGGT
      *      320     *      340     *      360     *      380     *      400
GACCGCCAGGGAATAGCGGGTGTGCAGACTGTTTTTCTCTCTGATGTATTTACTTTTTACGCTCTGTTATCTACACATGTGCTTAAGGTTGCACATCC
      *      420     *      440     *      460     *      480     *      500
ATGCCACTCCTTTTGATTGACAGATTAATTGATTGATAGATGGATGGATGGATTGATTGATTGATCGTTTTGAAAGACACATTTTACCGATTTGATTTAG
      *      520     *      540     *      560     *      580     *      600
ATAGATCGATAGATTATTTGACGGATTTATGGAGACAGTTATCAATACATTGACTGTTTCTTTTACTTTTGCCTTTTACATGGACCGTCTGTTGTGACGT
      *      620     *      640     *      660     *      680     *      700
ATCCAGTGCATGGACCTCTCCTGGACTCCTGAAGTCATCCTTTTGAACCAATGACCAGCTAATGGTCTGAAACATGCTCTGATGCAGTCATTGTTTCAGA
      *      720     *      740     *      760     *      780     *      800
CACTGATATTTTCGTTGATTGACTACCTGCTTGATGCCATGATCGATCGCGTGATGTACTTTGTTGGATTTTTGTTCTCGGTCCACTGCCTGGATAAGCT
      *      820     *      840     *      860     *      880     *      900
TCCCCTAGTCGTCGCTCGACCCGTCGGGTGGAATAATACCATTCTTTCAAGTGGGCATCCCCTGACCAGCAAAGCATAACTTACCTGGTACAGGGAAAAAC
      *      920     *      940     *      960     *      980     *      1000
CGTGATCAAGTTGGCGGTGTCCCAGGAGGAGGCCCTTCCATTGCACTTCGGTCGGGCTGATGCCTGCGATAGCCCCTAAATGTGGGCTACTCGGGGTACGG
      *
AATTTATACGTGTGGGG : 1017

```
