# Supplementary material
Source: PubMed Central journal article supplement (PMC3178405)

**Supplementary File S5** 5S ribosomal RNA predicted secondary structures of razor shells. Sequences used were complete after excluding the primer-annealing regions. Structures correspond to one or more species and species can have one or more structures. The downstream nontranscribed spacer group(s) of each 5S ribosomal coding region is indicated in parentheses (see main text). (a) *Ensis directus* (alpha). (b) *E. directus* (alpha). (c) *E. directus* (gamma, delta). (d) *E. macha* (theta). (e) *E. magnus*, *E. minor* (Chenu) (eta). (f) *E. ensis* (eta). (g) *Siliqua patula* (pi, rho); *E. directus* (alpha). (h) *S. patula* (omicron). (i) *Ensiculus cultellus* (nu). (j) *Pharus legumen* (lambda). (k) *P. legumen* (lambda). (l) *E. ensis* (zeta). (m) *E. directus* (alpha). (n) *E. siliqua* (eta). l, m, and n are putative pseudogenised copies (see main text).

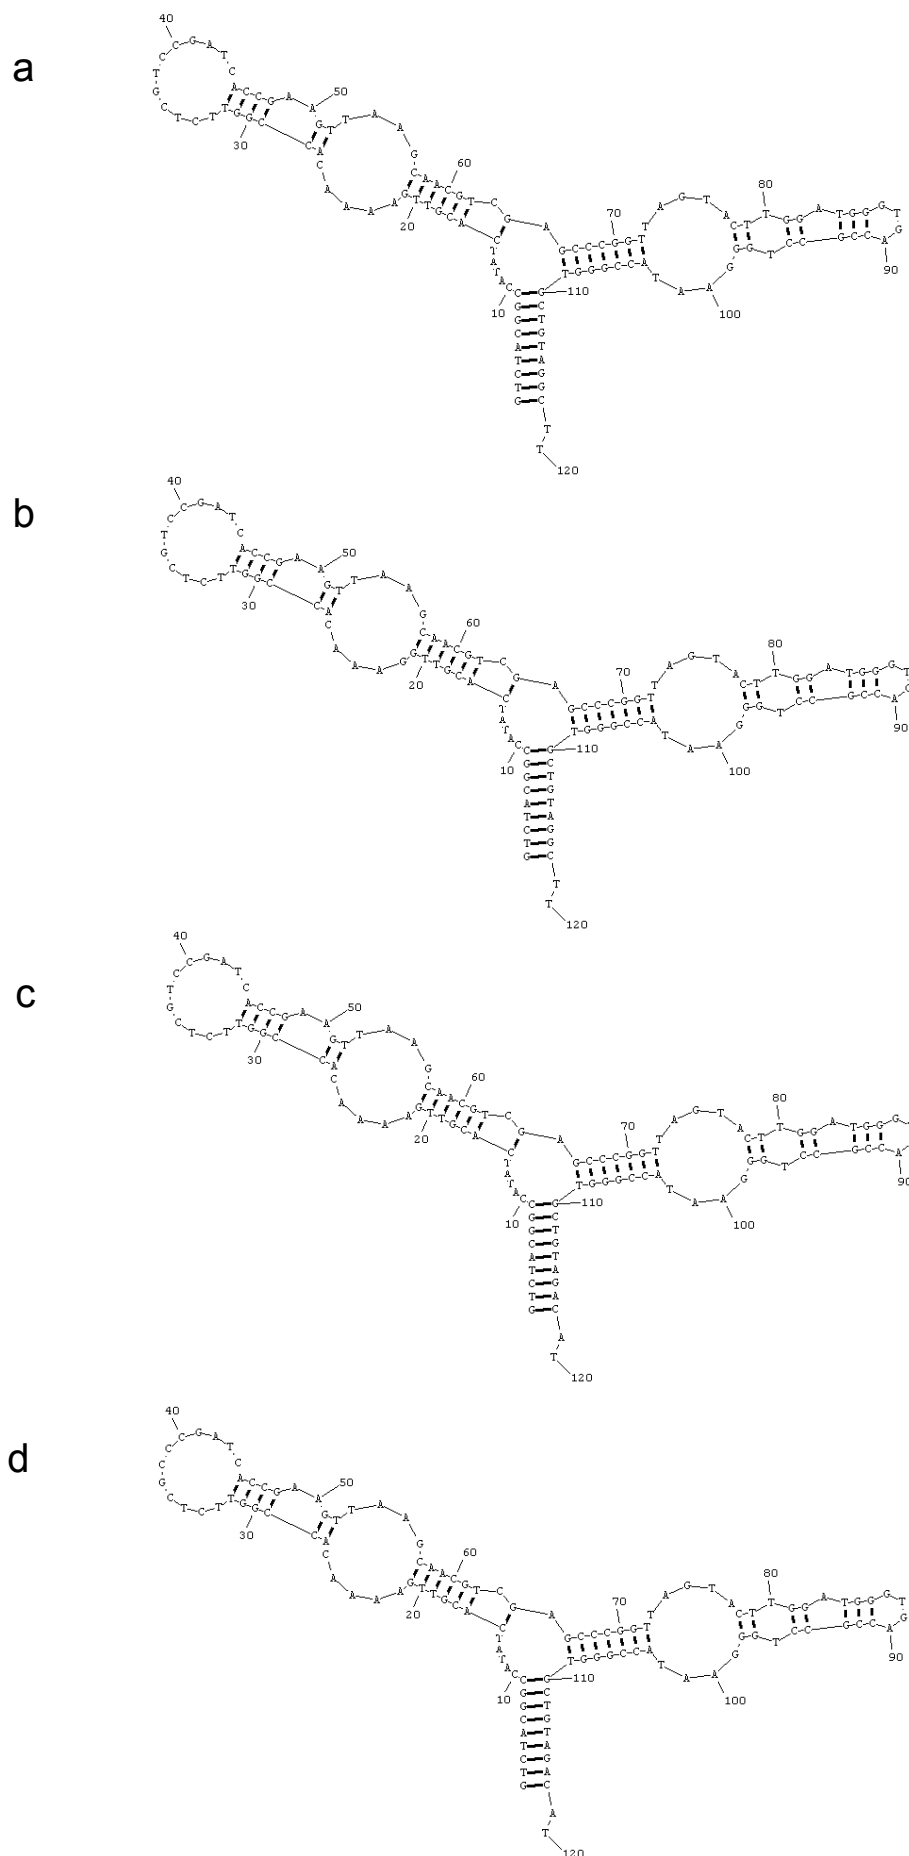

e

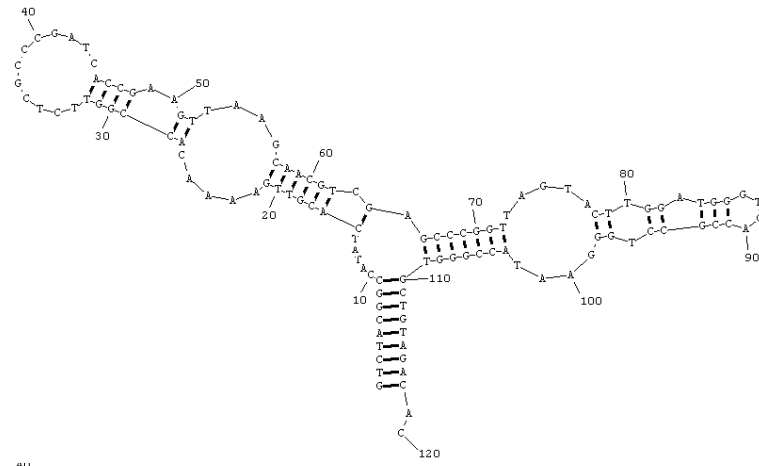

f

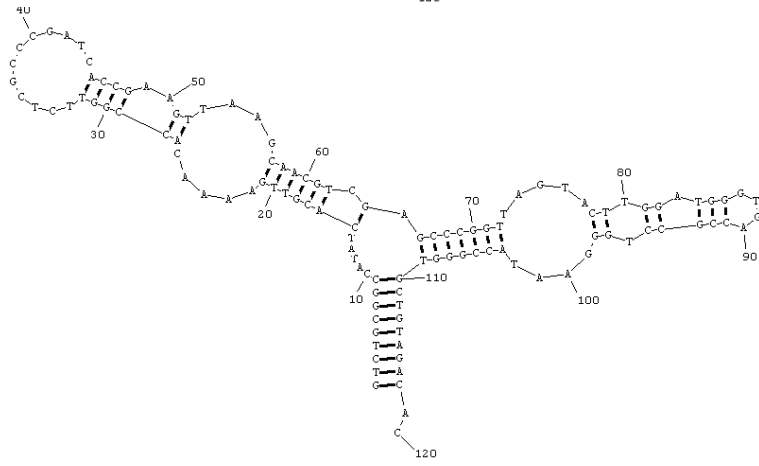

g

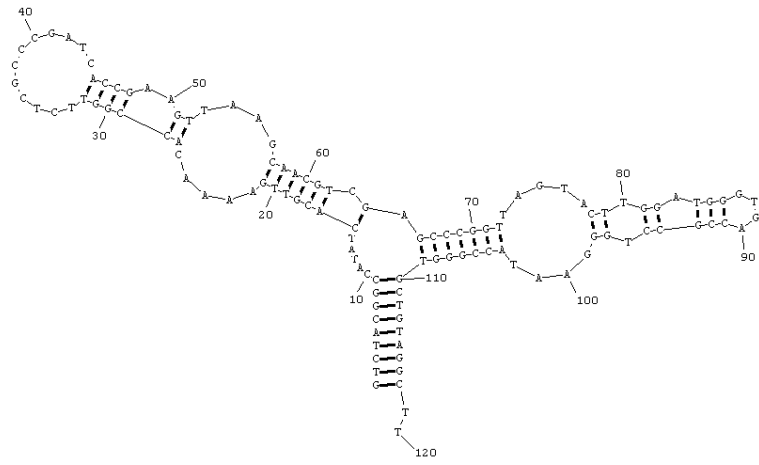

h

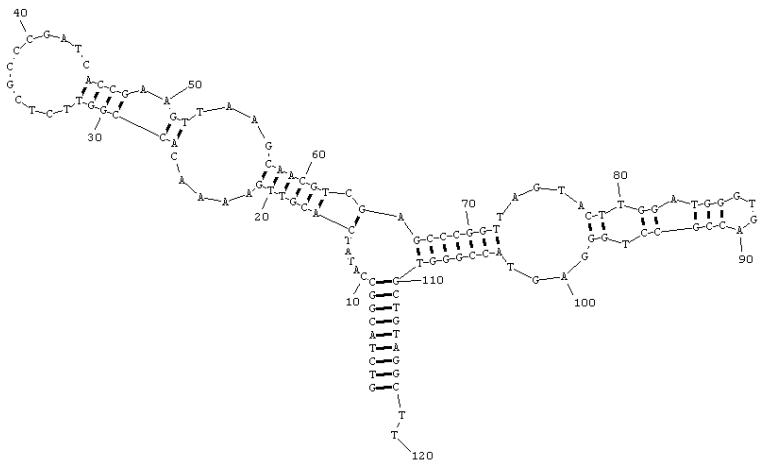

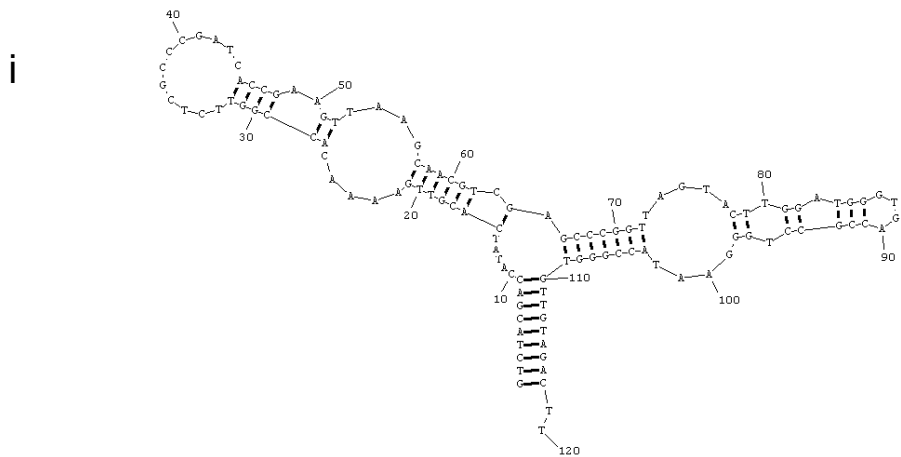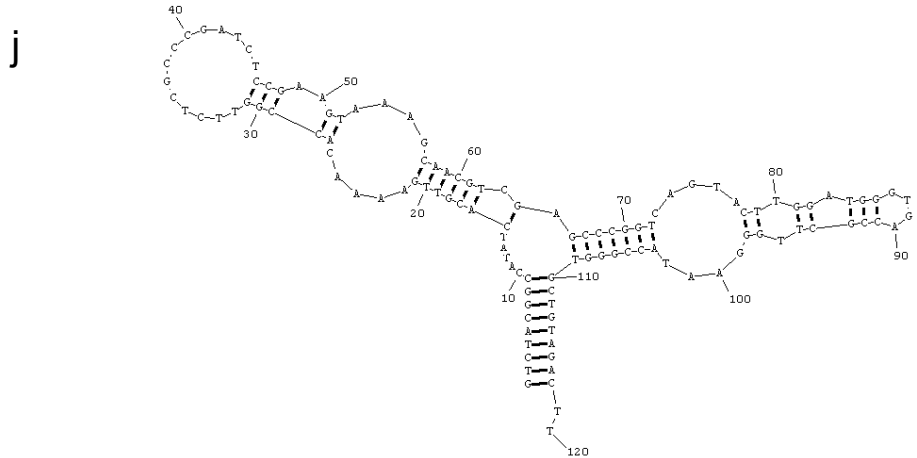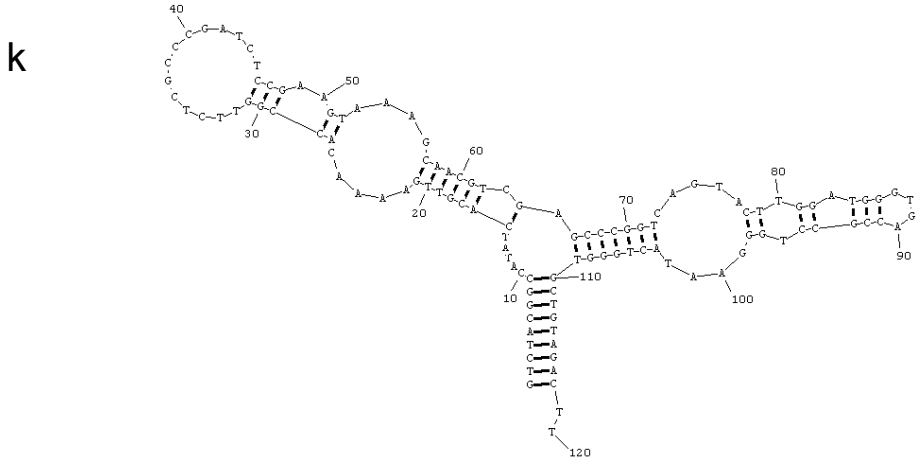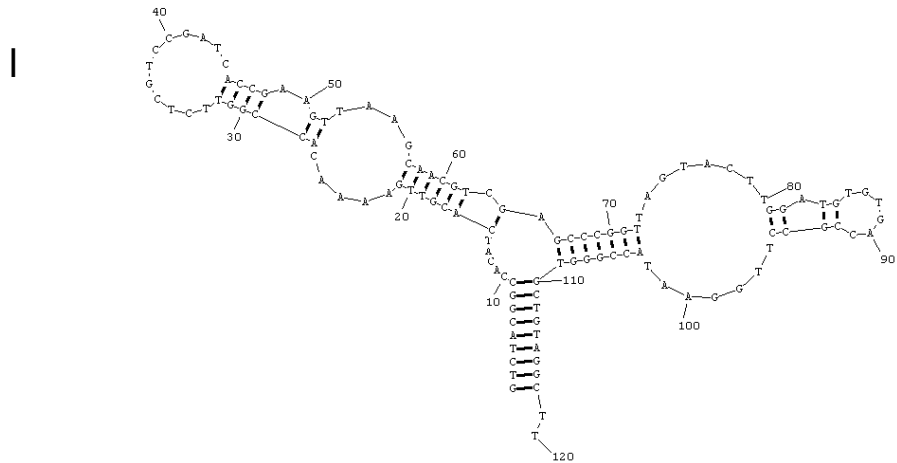

m

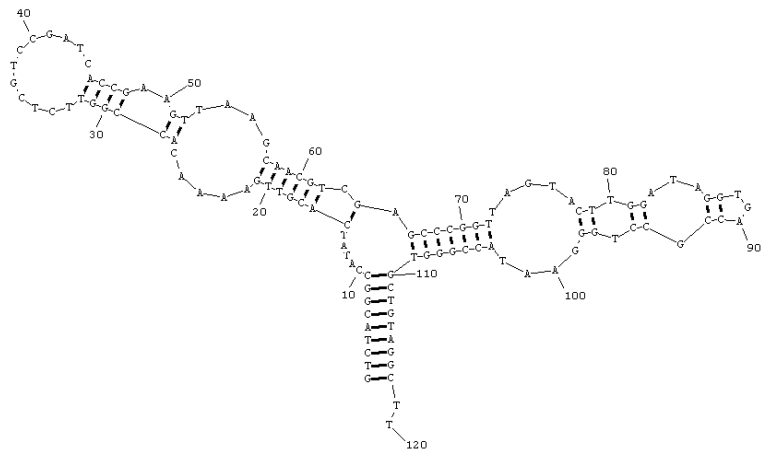

n

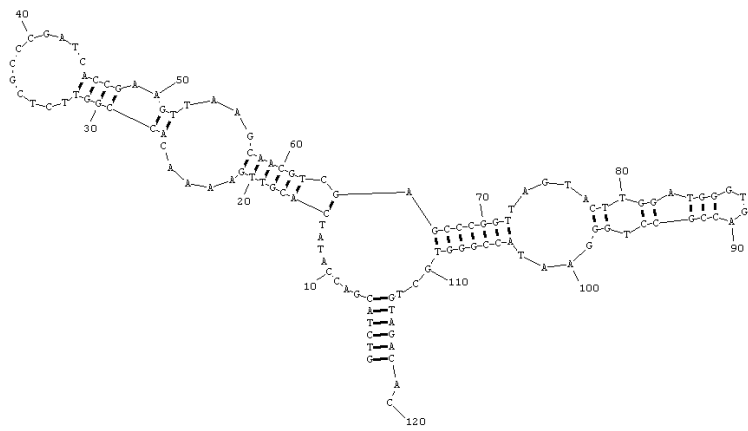

Supplement: hdy2010174x5.pdf [file hdy2010174x5.pdf]
