# Supplementary material
Source: PubMed Central journal article supplement (PMC3178405)

**Supplementary File S6** U1 small nuclear RNA predicted secondary structures of razor shells and gastropods. (a) *Ensis minor* (Chenu)<sup>1</sup>. (b) *E. magnus*<sup>2</sup>, *E. ensis*<sup>1</sup>, *E. siliqua*<sup>1</sup>. (c) *E. macha* type A<sup>3</sup>. (d) *E. macha* type B<sup>1</sup>. (e) *E. directus*<sup>3</sup>. (f) *Ensiculus cultellus*<sup>1</sup>. (g) *Pharus legumen*<sup>2</sup>. (h) *Aplysia californica*<sup>2</sup>. (i) *Lottia gigantea*<sup>2</sup>. (j) *E. minor* Dall<sup>3</sup>. (k) *Siliqua patula*<sup>1</sup>. (1) sequence built up with two clones from the same individual; (2) complete sequence after excluding the primer-annealing regions; (3) sequence completed with the last 23 nucleotides from *E. magnus* U1 small nuclear RNA (see main text); j and k are putative pseudogenised copies (see main text).

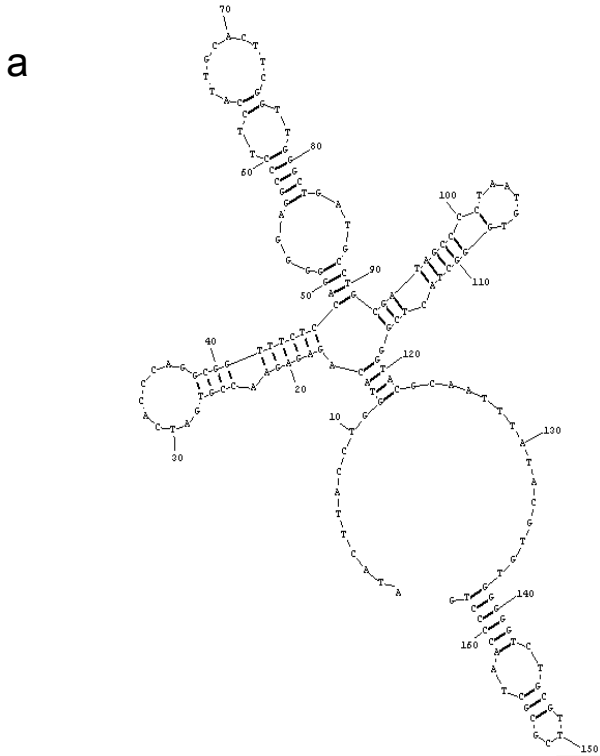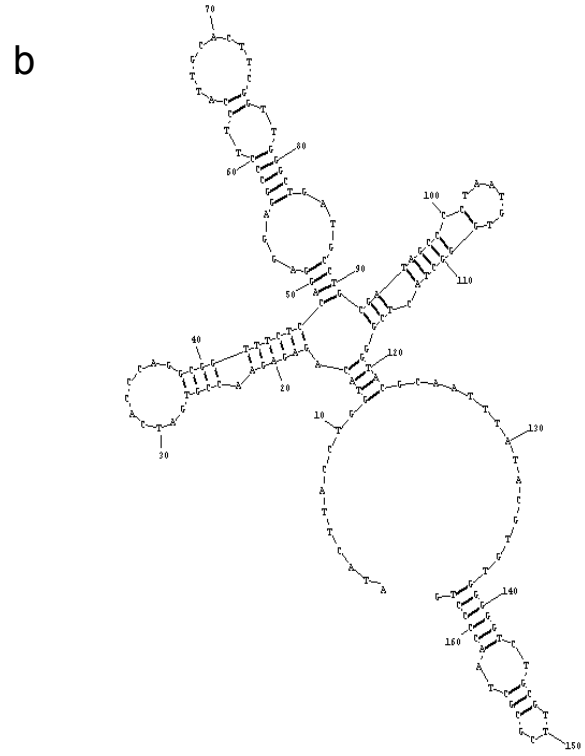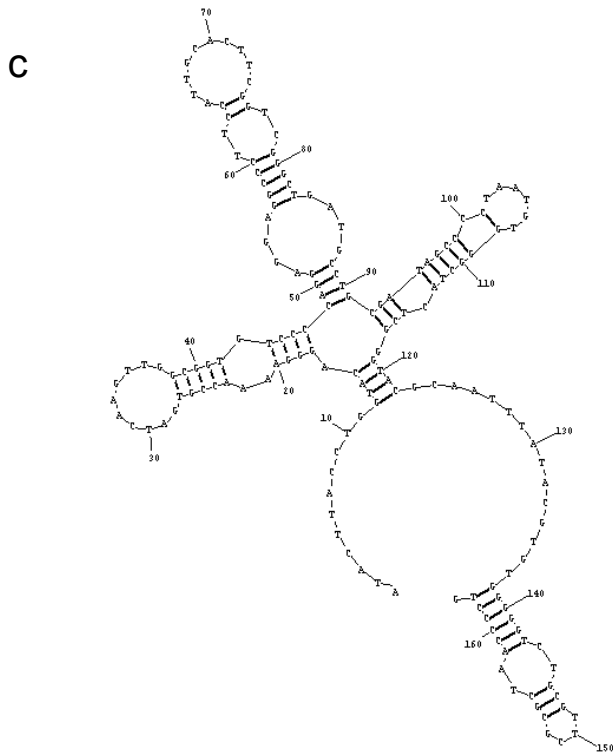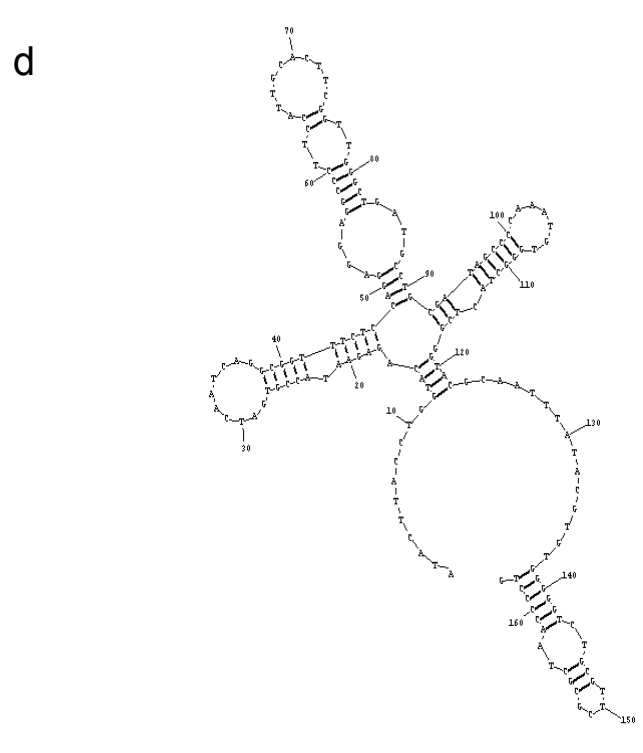

e

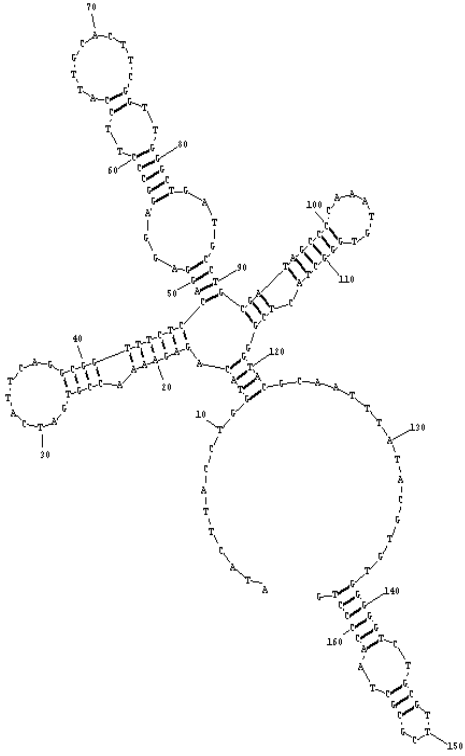

f

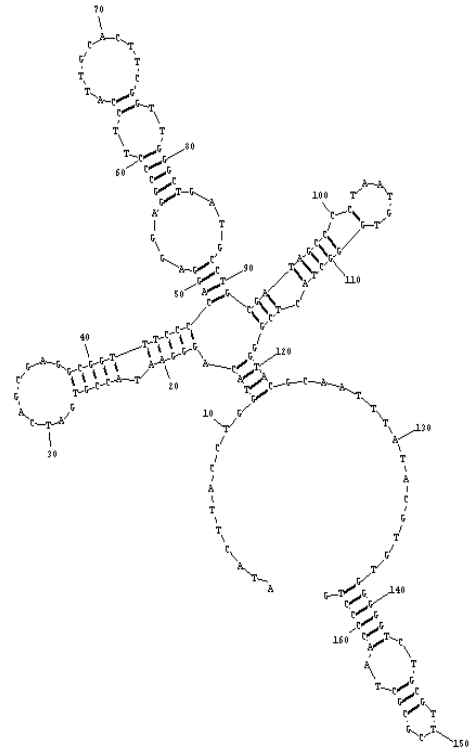

g

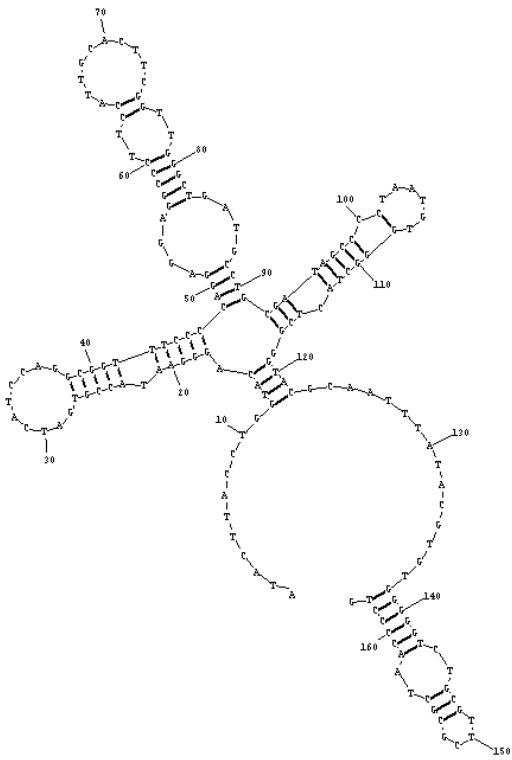

h

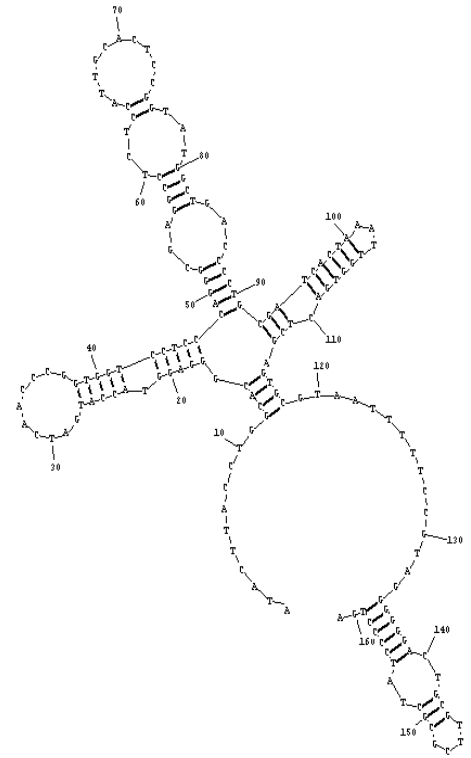

i

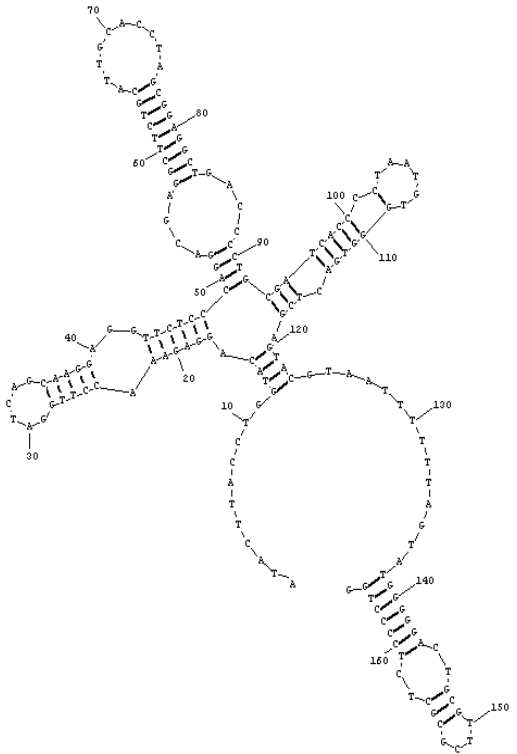

j

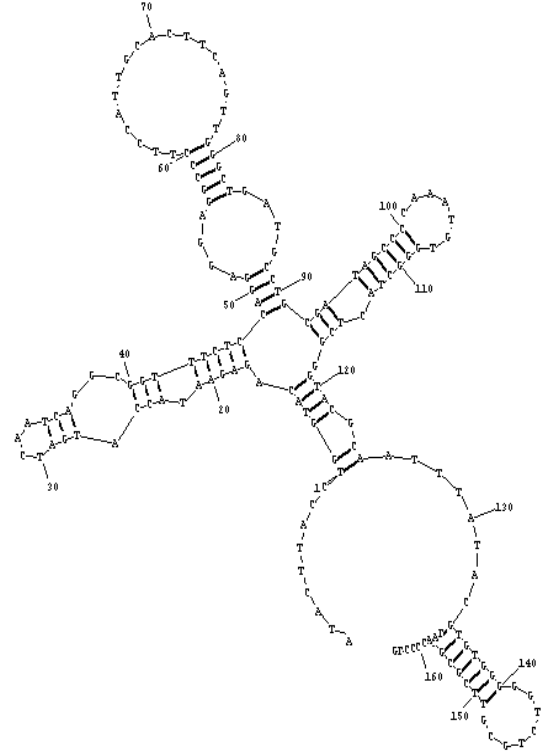

k

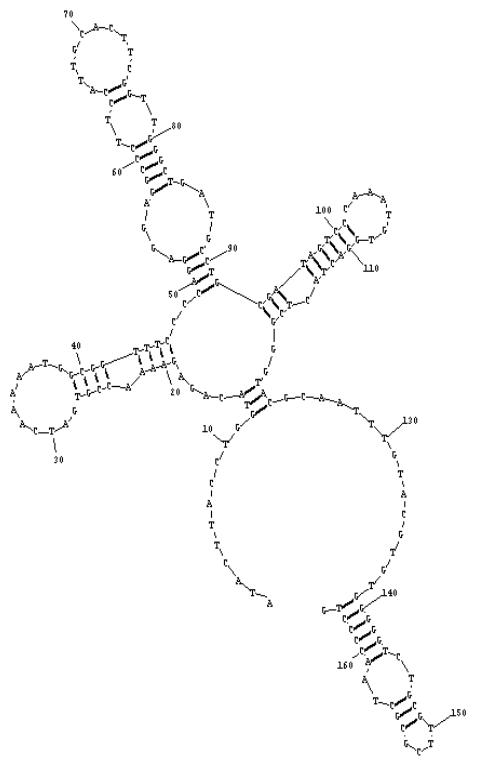

Supplement: hdy2010174x6.pdf [file hdy2010174x6.pdf]
