# Supplementary material
Source: PubMed Central journal article supplement (PMC3178405)

**Supplementary File S7** Phylogenetic relationships of 5S ribosomal RNA coding sequences from razor shells species. Sequences are not clearly clustered by species, and the low bootstrap values obtained do not support a clustering according to gene variants either. Asterisks (\*) indicate the copies retrieved from mixed clones of 5S ribosomal DNA and U1 small nuclear DNA. (a) Maximum likelihood phylogenetic tree constructed using the K80 model. Numbers on the tree correspond to nonparametric bootstrap supports (1000 replicates) and they are reported only for nodes with values  $\geq 50$ . (b) Phylogenetic network constructed using the neighbor net algorithm. For NTS types, see Table 3.

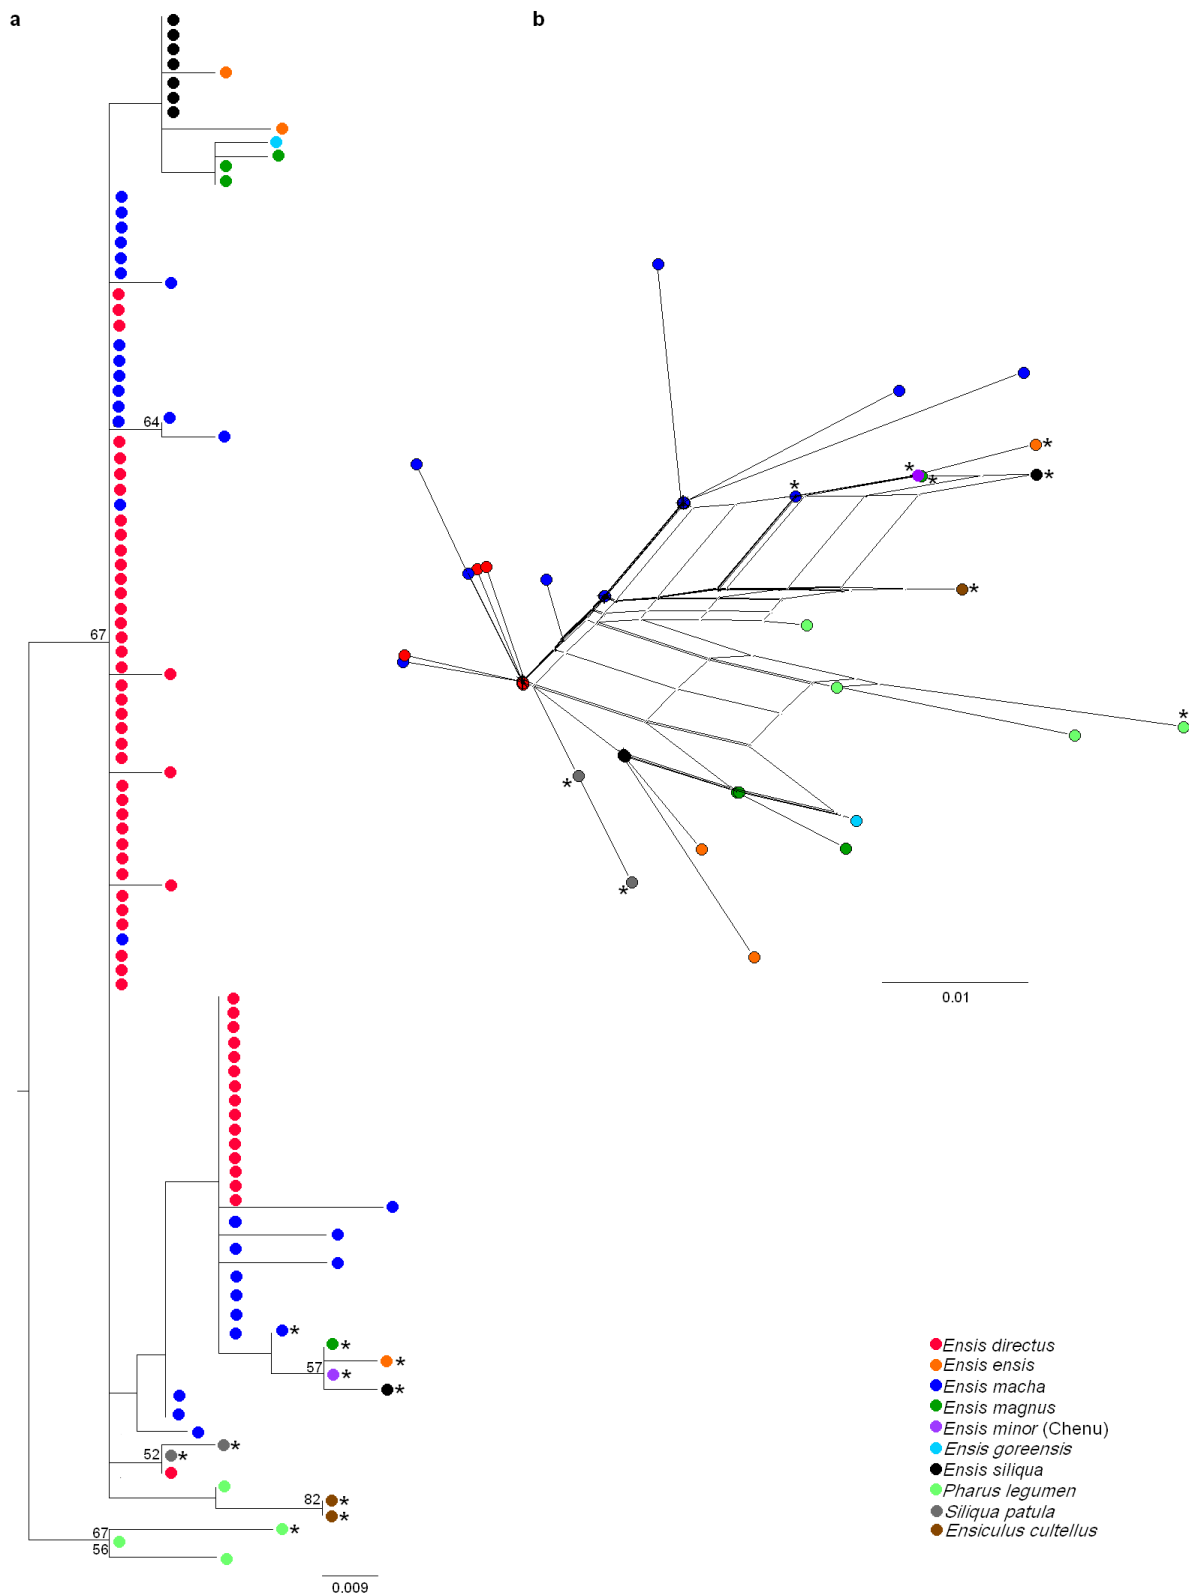

Supplement: hdy2010174x7.pdf [file hdy2010174x7.pdf]
